# Supplementary material for: Evaluation of nutrient content and caloric density in commercially available foods formulated for senior cats
Source: PubMed Central journal article supplement — J Vet Intern Med. 2020 Jul 10;34(5):2029–35. doi: 10.1111/jvim.15858 (PMC7517497; doi:10.1111/jvim.15858), 2020-07-10
Supplement: JVIM-34-2029-s001.pdf [file JVIM-34-2029-s001.pdf]

## MATURE/SENIOR CAT FOOD PRODUCTS

### Dry Food:

1. Authority Everyday Health Chicken and Rice Formula Mature Cat Food, PetSmart, Phoenix, AZ
2. Blue Healthy Aging Natural Chicken and Brown Rice Recipe Mature Cat Food, General Mills, Minneapolis, MN
3. Blue Wilderness Mature Chicken Recipe, General Mills, Minneapolis, MN
4. Fromm Family Mature Gold Food for Cats, Fromm Family Foods LLC, Mequon, WI
5. Halo Grain Free Senior Cat Chicken and Chicken Liver, Halo Pets, Tampa, FL
6. Hill's Science Diet Adult 11+ Dry Cat Food, Hill's Pet Nutrition Inc, Topeka, KS
7. Hill's Science Diet Adult 7+ Youthful Vitality Chicken and Rice Recipe, Hill's Pet Nutrition Inc, Topeka, KS
8. Iams Proactive Healthy Healthy Senior with Chicken, Mars, McLean, VA
9. Merrick Backcountry Grain Free Mature Recipe Cat Food, Nestle Purina PetCare, St. Louis, MO
10. Merrick Purrfect Bistro Indoor Senior Real Chicken and Sweet Potato Recipe Cat Food, Nestle Purina PetCare, St. Louis, MO
11. Nulo MedalSeries Senior Cat Turkey Alaska Pollock and Red Lentils Recipe Cat Food, Simmons Pet Foods, Siloam Springs, AR
12. NutriSource Senior/Weight Management Cat Chicken Meal and Peas Formula, KLN Family Brands, Perham, MI
13. Nutro Max Cat Senior Roasted Chicken Flavor Cat Food, Mars Petcare, Franklin, TN
14. Nutro Wholesome Essentials Indoor Senior Farm Raised Chicken and Brown Rice Recipe Cat Food, Mars Petcare, Franklin, TN
15. Pro Plan Prime Plus Adult 7+ Salmon and Rice Formula, Nestle Purina PetCare, St. Louis, MO
16. Purina ONE Vibrant Maturity 7+, Nestle Purina PetCare, St. Louis, MO
17. Simply Nourish Senior Cat Food Chicken and Rice Recipe, WellPet LLC, Tewksbury, MA
18. WholeHearted Grain Free Dry Cat Food Chicken Recipe Senior Formula for Ages 7+, Petco Animal Supplies, San Diego, CA
19. Wild Frontier Ancestral Diet with Chicken Senior Cat Food, Mars PetCare, Franklin, TN

### Canned Food:

1. Authority Everyday Health Chicken Entrée Mature Cat Food, PetSmart, Phoenix, AZ
2. Authority Everyday Health Ocean Fish and Rice Entrée Mature Cat Food, PetSmart, Phoenix, AZ
3. Blue Healthy Gourmet Pate Indoor Mature Chicken Entrée, General Mills, Minneapolis, MN
4. Blue Wilderness Mature Chicken Recipe, General Mills, Minneapolis, MN
5. Nutro Senior Soft Loaf Chicken Recipe Cat Food, Mars Petcare, Franklin, TN
6. Feline Health Nutrition Aging 12+, Royal Canin USA Inc., St Charles, MO
7. Feline Health Nutrition Instinctive 7+, Royal Canin USA Inc., St Charles, MO
8. Halo Grain Free Senior Cat Chicken and Chickpea Recipe, Halo Pets, Tampa, FL
9. Hill's Science Diet Adult 11+ Healthy Cuisine Seared Tuna & Carrot Medley, Hill's Pet Nutrition Inc, Topeka, KS
10. Hill's Science Diet Adult 7+ Tender Tuna Dinner, Hill's Pet Nutrition Inc, Topeka, KS
11. Pro Plan Prime Plus Adult 7+ Chicken and Beef Entrée Classic, Nestle Purina PetCare, St. Louis, MO
12. WholeHearted Chicken Recipe Pate Senior Formula for Adult Cats, Petco Animal Supplies, San Diego, CA

## ADULT CAT FOOD PRODUCTS

### Dry food:

1. Acana Grasslands, Champion Petfoods, Auburn, KY
2. Authority Indoor Chicken and Rice Formula, PetSmart, Phoenix, AZ
3. Blue Buffalo Indoor Health Chicken and Brown Rice Recipe, General Mills, Minneapolis, MN
4. Castor and Pollux Organix Chicken and Brown Rice Recipe, Nestle Purina PetCare, St. Louis, MO
5. Earthborn Holistic Primitive, Midwestern Pet Foods Inc, Evansville, IN
6. Elevate Glacier Bay Recipe, American Pet Nutrition, Ogden, UT
7. Fromm Beef Livattini Veg, Fromm Family Foods LLC, Mequon, WI
8. Fussie Cat Market Fresh Quail and Duck Meal Recipe, Pets Global Inc, Valencia, CA
9. Halo Holistic Chicken and Chicken Liver Recipe, Halo Pets, Tampa, FL
10. Hill's Science Diet Adult Sensitive Stomach and Skin, Hill's Pet Nutrition Inc, Topeka, KS
11. Iams Proactive Health Healthy Adult with Salmon and Tuna, Mars, McLean, VA
12. Instinct Raw Boost Indoor Health Grain Free Recipe with Real Rabbit, Nature's Variety, St. Louis, MO
13. Purina Cat Chow Indoor Immune Health Blend, Nestle Purina PetCare, St. Louis, MO
14. Purina Fancy Feast Gourmet with Savory Chicken and Turkey, Nestle Purina PetCare, St. Louis, MO
15. Purina Friskie Seafood Sensations, Nestle Purina PetCare, St. Louis, MO
16. Purina One Indoor Advantage, Nestle Purina PetCare, St. Louis, MO
17. Purina ProPlan Focus Indoor Care, Nestle Purina PetCare, St. Louis, MO
18. Merrick Purrfect Bistro Grain Free Salmon Recipe, Nestle Purina PetCare, St. Louis, MO
19. Natural Balance Limited Ingredient Diet Green Pea and Duck Formula, Dick Van Patten's Natural Balance Pet Foods, Los Angeles, CA
20. Natural Balance Limited Ingredient Diets High Protein Tuna Formula, Dick Van Patten's Natural Balance Pet Foods, Los Angeles, CA
21. Nulo MedalSeries Indoor Adult Cat Turkey and Chicken, Simmons Pet Foods, Siloam Springs, AR
22. NutriSource PureVita Grain Free Duck and Red Lentils, KLN Family Brands, Perham, MI
23. Nutrisource PureVita Grain Free Salmon and Peas Entrée, KLN Family Brands, Perham, MI
24. Nutro Wholesome Essentials Salmon and Whole Brown Rice, Mars PetCare, Franklin, TN
25. Open Farm Pasture-Raised Lamb, Pilgrim's Pride Corporation, Greeley, CO
26. Orijen Six Fish, Champion Petfoods, Auburn, KY
27. Taste of the Wild Prey Angus Beef, Diamond Pet Foods, Meta, MO
28. Twin Pet Complete Formula, Simmons Pet Food, Siloam Springs, AR
29. Wellness CORE Natural Grain Free Chicken and Turkey Indoor, WellPet LLC, Tewksbury, MA
30. Wellness CORE RawRev Grain-Free Original Recipe with Freeze-Dried Turkey Liver, WellPet LLC, Tewksbury, MA

### Canned food:

1. 9Lives Meaty Pate with Tuna and Chicken, Big Heart Pet Brands, San Francisco, CA
2. Authority Chicken Entrée Adult Pate, PetSmart, Phoenix, AZ
3. Blue Buffalo Blue Wilderness Duck Recipe, General Mills, Minneapolis, MN
4. Canidae Grain-Free PURE Elements Chicken, Turkey, and Lamb Formula, Canidae Pet Food Corporation, San Luis Obispo, CA
5. Castor and Pollux Organix Grain Free Organic Turkey Recipe, Nestle Purina PetCare, St. Louis, MO
6. Crave Salmon Pate, Mars Petcare, Franklin, TN
7. Fancy Feast Classic Pate Tender Beef Feast, Nestle Purina PetCare, St. Louis, MO
8. Fromm Chicken and Salmon Pate, Fromm Family Foods LLC, Mequon, WI
9. Hounds & Gatos Lamb Formula, Gott Pet Products, St. Francis, WI

10. Instinct Grain-Free Duck, Nature's Variety, St. Louis, MO
11. Instinct Original Grain-Free Real Rabbit Recipe, Nature's Variety, St. Louis, MO
12. Instinct Original Grain-Free Real Venison Recipe, Nature's Variety, St. Louis, MO
13. Instinct Original Beef Recipe, Nature's Variety, St. Louis, MO
14. Kasiks Cage-Free Turkey Formula, FirstMate, British Columbia, Canada
15. Merrick Limited Ingredient Grain Free Real Duck Recipe, Nestle Purina PetCare, St. Louis, MO
16. Natural Balance Limited Ingredient Diet Salmon and Green Pea, Dick Van Patten's Natural Balance Pet Foods, Los Angeles, CA
17. Natural Balance Limited Ingredient Diets Venison and Green Pea Formula, Dick Van Patten's Natural Balance Pet Foods, Los Angeles, CA
18. Nulo Freestyle Salmon & Mackerel Recipe, Simmons Pet Foods, Siloam Springs, AR
19. Nutro Max Cat Adult Salmon Entrée, Mars PetCare, Franklin, TN
20. Open Farm Grass-Fed Beef Rustic Blend, Pilgrim's Pride Corporation, Greeley, CO
21. Purina Friskies Classic Pate Mariner's Catch, Nestle Purina PetCare, St. Louis, MO
22. Purina Pro Plan Savor Adult Beef, Carrots, and Rice Entrée, Nestle Purina PetCare, St. Louis, MO
23. Purina Pro Plan Savor Adult Chicken and Rice Entrée, Nestle Purina PetCare, St. Louis, MO
24. Purina Pro Plan Savor Adult Turkey and Rice Entrée in Gravy, Nestle Purina PetCare, St. Louis, MO
25. Sheba Perfect Portions Tender Beef Entrée Pate, Mars PetCare, Franklin, TN
26. Simply Nourish Limited Ingredient Duck and Pea, American Nutrition, Ogden, UT
27. Wellness Complete Health Pate Beef and Chicken, WellPet LLC, Tewksbury, MA
28. Wellness Signature Select Grain Free Natural Skipjack Tuna with Shrimp Entrée, WellPet LLC, Tewksbury, MA
29. Weruva Two Tu Tango, Songkla Canning Company, Bangkok, Thailand
