# Supplementary material for: Evaluation of nutrient content and caloric density in commercially available foods formulated for senior cats
Source: PubMed Central journal article supplement — J Vet Intern Med. 2020 Jul 10;34(5):2029–35. doi: 10.1111/jvim.15858 (PMC7517497; doi:10.1111/jvim.15858), 2020-07-10
Supplement: JVIM-34-2029-s002.pdf [file JVIM-34-2029-s002.pdf]

**Supplemental Table S1.** Caloric density 'as fed' (median and range; kcal/100 grams) for canned and dry senior (n=31) and adult (n=59) cat foods.

| Adult         |               |
|---------------|---------------|
| Canned (n=29) | 123 (70-184)  |
| Dry (n=30)    | 370 (333-409) |
| Senior        |               |
| Canned (n=12) | 108 (78-134)  |
| Dry (n=19)    | 366 (312-393) |
